# Supplementary material for: In Vitro Characterisation of the Antioxidative Properties of Whey Protein Hydrolysates Generated under pH- and Non pH-Controlled Conditions
Source: PubMed Central journal article supplement (PMC7278780; doi:10.3390/foods9050582), 2020-05-05
Supplement: foods-09-00582-s001.pdf [file foods-09-00582-s001.pdf]

Supplementary data

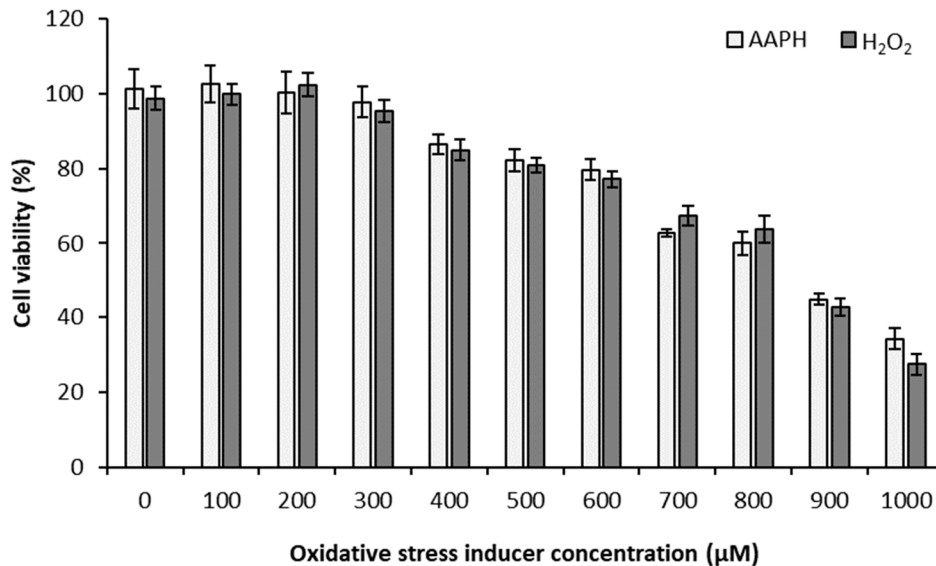

**Figure S1** Effect of different concentrations of oxidative stress inducers, 2,2'-azobis(2-amidinopropane) dihydrochloride (AAPH) and hydrogen peroxide (H<sub>2</sub>O<sub>2</sub>), on HepG2 cell viability. The results were expressed as the percentage of viable cells remaining following treatment with oxidative stress inducers compared to untreated control cells. Values represent mean ± SD (*n*=3).

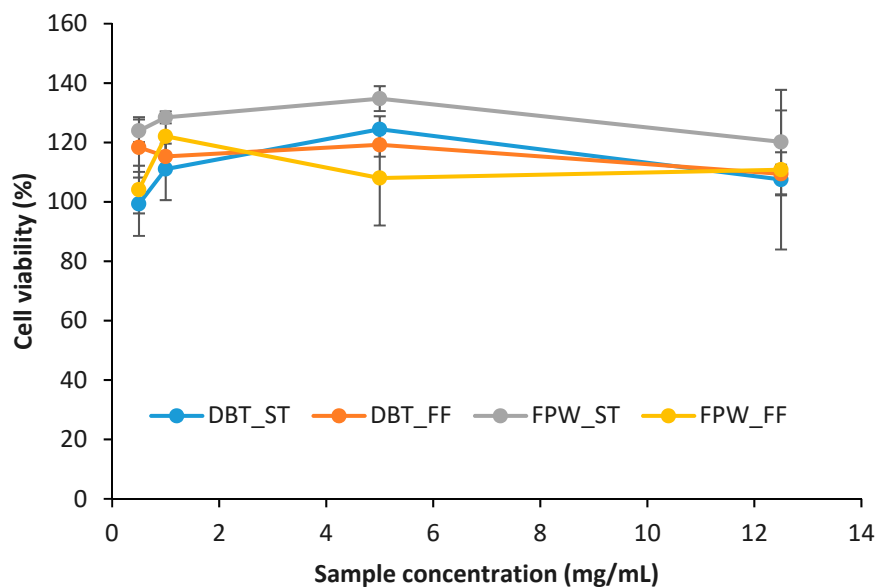

**Figure S2** Viability of HepG2 cells treated with the 4 h whey protein hydrolysates (WPHs) generated using FlavorPro Whey (FPW) and Debitrase (DBT) under pH- (ST) and non pH-controlled (FF) conditions. The results were expressed as the percentage of viable cells remaining following treatment with the different WPHs compared to untreated control cells. Values represent mean ± SD (*n*=3).
